# Supplementary material for: Regional differences of hypothermia on oxidative stress following hypoxia-ischemia: a study of DHA and hypothermia on brain lipid peroxidation in newborn piglets
Source: publisher site journal article supplement (doi:10.1515/jpm-2017-0355), 2018-08-15
Supplement: Supplementary file 1 [file Supplementary Figure S1. Complete Experimental Design.pdf › Supplementary Figure S1. Complete Experimental Design.pdf]

# Experimental design

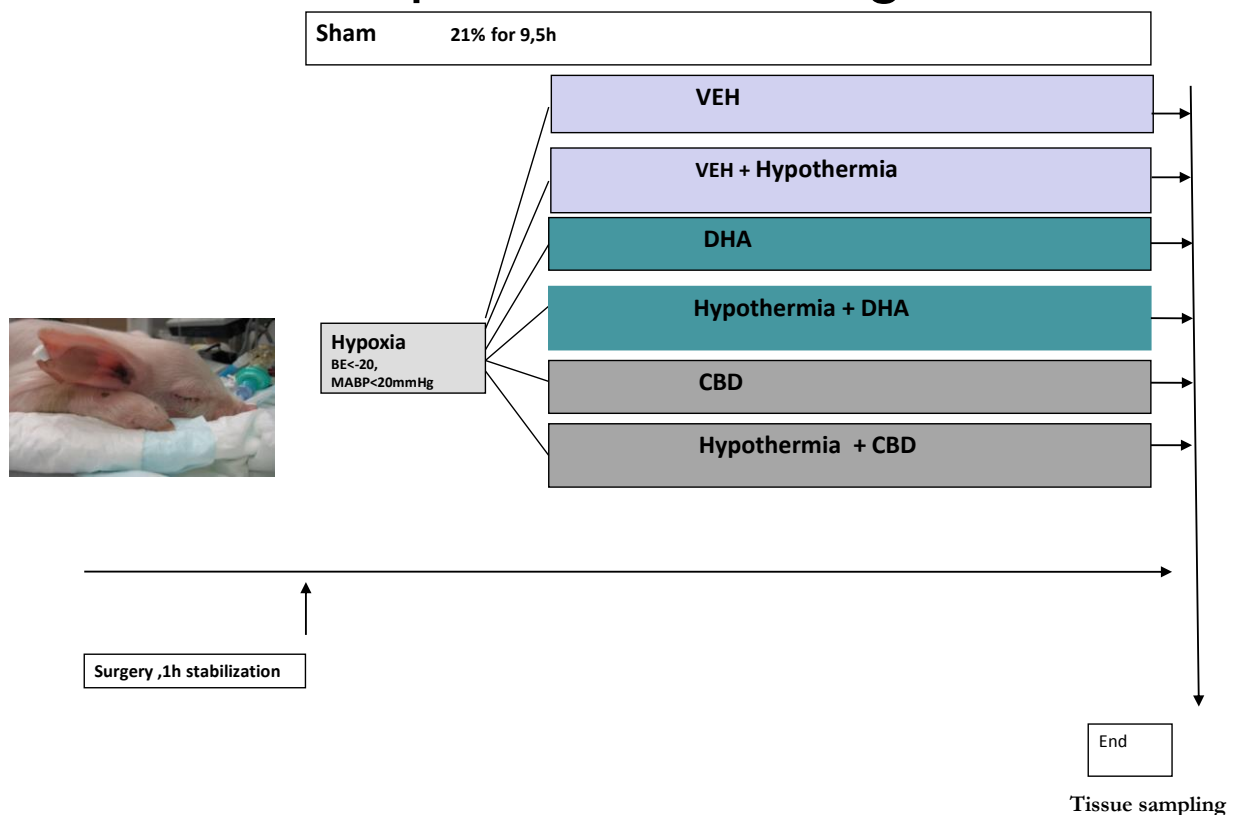

The shared groups in the two studies are Sham (n=7), Hypoxia (n=12) and Hypothermia (n=12).

Half of the shared groups received 0,4 ml vehicle of ethanol:solutol:saline at a ratio of 2:1:17. The other half received solely saline.

As described in the Garberg study[1], the vehicle mainly contains saline (85%) as equivalent with the dissolvent for DHA.

We have done statistical analysis accordingly, and compared those piglets who did not receive vehicle to the vehicle group, and there were no statistical differences regarding physiology or any of the other analysis that were made. The groups were then pooled and called "Hypoxia" and "Hypothermia" or as in the Garberg study, called VEH and VEH + H.

The Sham group did not receive any intervention and is shared for the two studies.

1. Garberg HT, Huun MU, Escobar J, Martinez-Orgado J, Loberg EM, Solberg R, et al. Short-term effects of cannabidiol after global hypoxia-ischemia in newborn piglets. *Pediatric research*. 2016.
