# Supplementary material for: Regional differences of hypothermia on oxidative stress following hypoxia-ischemia: a study of DHA and hypothermia on brain lipid peroxidation in newborn piglets
Source: publisher site journal article supplement (doi:10.1515/jpm-2017-0355), 2018-08-15

**Profile plots of prostanoids in cortex where there were interactions present: 0=no, 1=yes.**

**NeuroFs:**


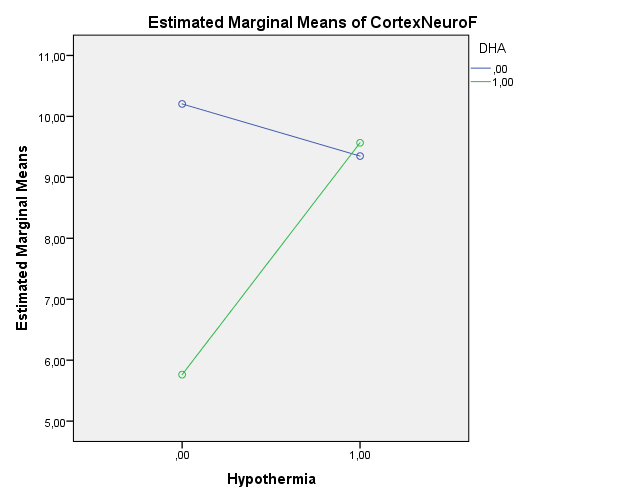


**DH-IsoPs:**


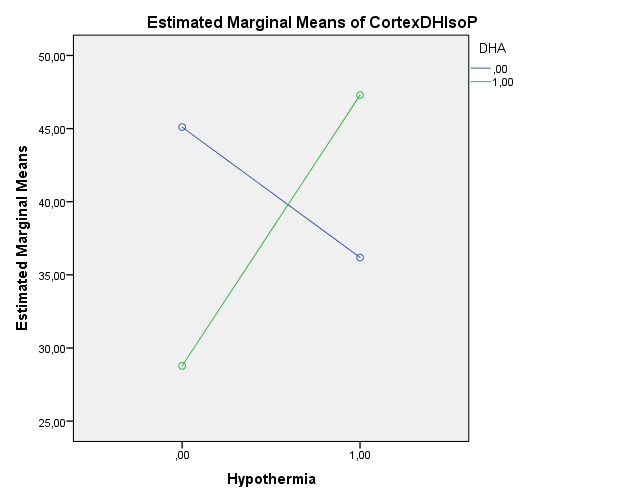

Supplement: Supplementary file 1 [file Supplementary Figure S2. Profile plots interactions cortex.docx]
